# Supplementary material
Source: Springer Nature journal article supplement (https://www.springermedizin.de/resource/supplementary/12985_2009_794_MOESM6_ESM.pdf/9609204)
Supplement: MOESM6 [file 9609204]

**A**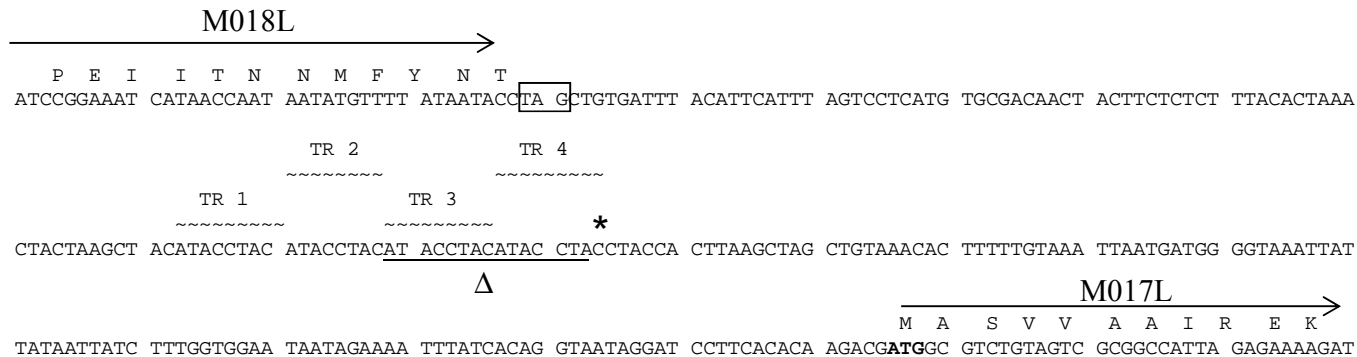**B****Strain**

|      | TR1                    | TR2              | * TR5 *  | TR3       | TR4                                  |
|------|------------------------|------------------|----------|-----------|--------------------------------------|
| Lu   | ACACTAAACTACTAAGCTACAT | ACCTACATACCTACAT | -----    | ACCTACATA | CCTACCTACCCTTAAGCTAGCTGTAAACACTTTTT  |
| 87   | ACACTAAACTACTAAGCTACAT | ACCTACATACCTACAT | ACCTACAT | ACCTACATA | CCTACCTACCCTTAAGCTAGCTGTAAACACTTTTT  |
| 466  | ACACTAAACTACTAAGCTACAT | ACCTACATACCTACAT | -----    | ACCTACATA | CCTACCTACCCTTAAGCTAGCTGTAAACACTTTTT  |
| 2012 | ACACTAAACTACTAAGCTACAT | ACCTACATACCTACAT | -----    | ACCTACATA | CCTACCTACCCTTAAGCTAGCTGTAAACACTTTTT  |
| 86   | ACACTAAACTACTAAGCTACAT | ACCTACATACCTACAT | -----    | ACCTACATA | CCTACCTACCCTTAAGCTAGCTGTAAACACTTTTT  |
| 2788 | ACACTAAACTACTAAGCTACAT | ACCTACATACCTACAT | -----    | ACCTACATA | CCTACCTACCCTTAAGCTAGCTGTAAACACTTTTT  |
| 7514 | ACACTAAACTACTAAGCTACAT | ACCTACATACCTACAT | -----    | ACCTACATA | CCTACCTACCCTTAAGCTAGCTGTAAACACTTTTT  |
| 1312 | ACACTAAACTACTAAGCTACAT | ACCTACATACCTACAT | -----    | ACCTACATA | CCTACCTACCCTTAAGCTAGCTGTAAACACTTTTT  |
| 7411 | ACACTAAACTACTAAGCTACAT | -----            | -----    | ACCTACATA | CCTACCTACCCTTAAGCTAGCTGTAAACACTTTTT  |
| 4604 | ACACTAAACTACTAAGCTACAT | ACCTACATACCTACAT | -----    | ACCTACAT  | GCCTACCTACCCTTAAGCTAGCTGTAAACACTTTTT |
| 6918 | ACACTAAACTACTAAGCTACAT | ACCTACATACCTACAT | -----    | ACCTACATA | CCTACCTACCCTTAAGCTAGCTGTAAACACTTTTT  |
